# Supplementary material for: Diagnostic Performance of the New Version (v2.0) of GenoType MTBDRsl Assay for Detection of Resistance to Fluoroquinolones and Second-Line Injectable Drugs: a Multicenter Study
Source: PubMed Central journal article supplement — J Clin Microbiol. 2015 Aug 18;53(9):2961–9. doi: 10.1128/JCM.01257-15 (PMC4540937; doi:10.1128/jcm.01257-15), 2015-08-18
Supplement: JCM.01257-15_zjm999094490so1.pdf [file JCM.01257-15_zjm999094490so1.pdf]

1 **Supplemental Material - Diagnostic Performance of the new version of GenoType**  
 2 **MTBDRsl (V2.0) Assay for detection of resistance to Fluoroquinolones and Second Line**  
 3 **Injectable Drugs: a Multicenter study.**

4  
 5 **Supplementary Table S1** Performance of GenoType®MTBDRsl V2.0 assay as compared to  
 6 phenotypic DST to ofloxacin on 226 clinical isolates and to moxifloxacin on 97 clinical isolates.  
 7 OFL: ofloxacin; MOXI: moxifloxacin; CI: Confidence Interval; DST: Drug susceptibility  
 8 testing; PPV: positive predictive value; NPV: negative predictive value.

| <b>OFL</b>           | <b>Phenotypic DST</b> |                 |
|----------------------|-----------------------|-----------------|
|                      | <b>%</b>              | <b>(95% CI)</b> |
| Sensitivity          | 84.7                  | (74.7, 91.2)    |
| Specificity          | 100                   | (97.6, 100)     |
| PPV                  | 100                   | (94.1, 100)     |
| NPV                  | 93.3                  | (88.5, 96.3)    |
| Likelihood ratio pos | Undefined             | Undefined       |
| Likelihood ratio neg | 0.153                 | (0.13 - 0.18)   |
| Diagnostic Accuracy  | 95.1                  | (91.5, 97.3)    |

| <b>MOXI</b>          | <b>Phenotypic DST</b> |                 |
|----------------------|-----------------------|-----------------|
|                      | <b>%</b>              | <b>(95% CI)</b> |
| Sensitivity          | 90.0                  | (69.9, 97.2)    |
| Specificity          | 97.4                  | (91.0, 99.3)    |
| PPV                  | 90                    | (69.9, 97.2)    |
| NPV                  | 97.4                  | (91.0, 99.3)    |
| Likelihood ratio pos | 34.7                  | (12.9, 93.5)    |
| Likelihood ratio neg | 0.103                 | (0.03 - 0.27)   |
| Diagnostic Accuracy  | 95.9                  | (89.9, 93.4)    |

10 **Supplementary Table S2** Performance of GenoType®MTBDRsl V2.0 assay as compared to  
 11 phenotypic DST to ofloxacin on 228 clinical specimens, to levofloxacin on 53 clinical specimens  
 12 and to moxifloxacin on 25 clinical specimens. OFL: ofloxacin; LEVO: levofloxacin, MOXI:  
 13 moxifloxacin; CI: Confidence Interval; DST: Drug susceptibility testing; PPV: positive  
 14 predictive value; NPV: negative predictive value.

| <b>OFL</b>           | <b>Phenotypic DST</b> |                 |
|----------------------|-----------------------|-----------------|
|                      | <b>%</b>              | <b>(95% CI)</b> |
| Sensitivity          | 92.9                  | (83.0, 97.2)    |
| Specificity          | 97.7                  | (94.3, 99.1)    |
| PPV                  | 92.9                  | (83.0, 97.2)    |
| NPV                  | 97.7                  | (94.3, 99.1)    |
| Likelihood ratio pos | 39.9                  | (24.4, 65.4)    |
| Likelihood ratio neg | 0.07                  | (0.04, 0.119)   |
| Diagnostic Accuracy  | 96.5                  | (93.2, 98.2)    |

| <b>LEVO</b>          | <b>Phenotypic DST</b> |                 |
|----------------------|-----------------------|-----------------|
|                      | <b>%</b>              | <b>(95% CI)</b> |
| Sensitivity          | 100                   | (67.6, 100)     |
| Specificity          | 91.1                  | (79.3, 96.5)    |
| PPV                  | 66.7                  | (39.1, 86.2)    |
| NPV                  | 100                   | (91.4, 100)     |
| Likelihood ratio pos | 11.3                  | (6.89, 18.4)    |
| Likelihood ratio neg | 0                     | (0.0, "?")      |
| Diagnostic Accuracy  | 92.5                  | (82.1, 97.0)    |

| <b>MOXI</b>          | <b>Phenotypic DST</b> |                 |
|----------------------|-----------------------|-----------------|
|                      | <b>%</b>              | <b>(95% CI)</b> |
| Sensitivity          | 100                   | (78.5, 100)     |
| Specificity          | 90.9                  | (62.3, 98.4)    |
| PPV                  | 93.3                  | (70.2, 98.8)    |
| NPV                  | 100                   | (72.3, 100)     |
| Likelihood ratio pos | 11                    | (1.55, 78.1)    |

|                      |      |              |
|----------------------|------|--------------|
| Likelihood ratio neg | 0    | (0.0, ?)     |
| Diagnostic Accuracy  | 96.0 | (80.5, 99.3) |

---

15

16
